# Supplementary material for: Gold nanoparticle-based lateral flow immunoassay for the rapid detection of flutriafol residues in food
Source: Royal Society of Chemistry journal article supplement (doi:10.1039/d2qm01231f), 2023-01-01
Supplement: d2qm01231f1.pdf [file d2qm01231f1.pdf]

**Gold nanoparticle-based lateral flow immunoassay for the  
rapid detection of flutriafol residues in food  
(Supporting information)**

## Contents

**Fig S1.** Identification of FTF-hapten. (A) The liquid chromatogram and mass spectrum; (B)  $^1\text{H}$  NMR.

**Fig S2.** (A) The image of gel electropherogram (1 represent FTF-hapten-BSA and 2 represent BSA). (B) The UV–Vis spectroscopy of FTF-hapten, proteins and conjugates.

**Fig S3.** (A) TEM image of GNPs-labeled anti-FTF mAb. (B) UV-Vis spectrum of GNPs-labeled anti-FTT mAb.

**Fig S4.** LC-MS/MS analysis of FTF standard solution and real food samples. (A) The FTF standard solution. (B-D) The samples of rice, tomato and grape, respectively.

**Fig S5.** The specificity of the GNP based lateral flow immunoassay by comparing FTF and other structural analogs.

**Fig S6.** (A-C) The regression equation of FTF in rice, tomato and grape by LC-MS/MS. (D-F) LC-MS/MS spectra of different concentrations of FTF in rice, tomato and grape (Due to the high FTF MRLs requirements, considering the detection limit of the instrument method, rice, tomato and grape sample were diluted 50 times).

**Table S1.** Instrument conditions for the analysis of FTF by LC-MS/MS.

**Table S2.** The specificity of the FTF-mAb was determined by ic-ELISA.

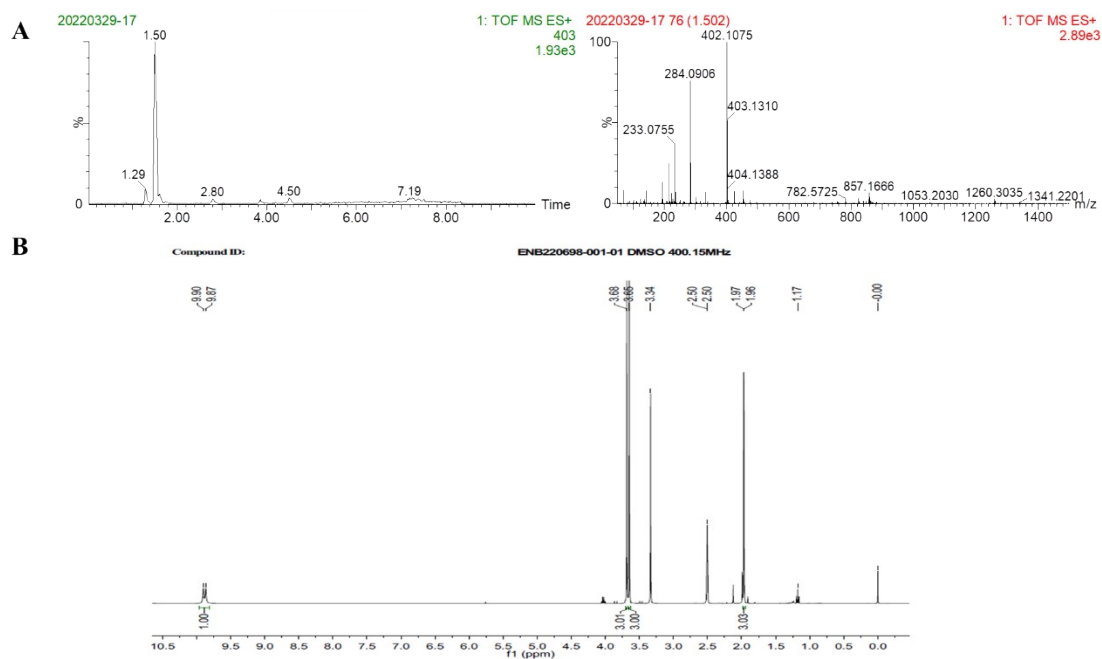

**Fig S1.** Identification of FTF-hapten. (A) The liquid chromatogram and mass spectrum; (B)  $^1\text{H}$  NMR.

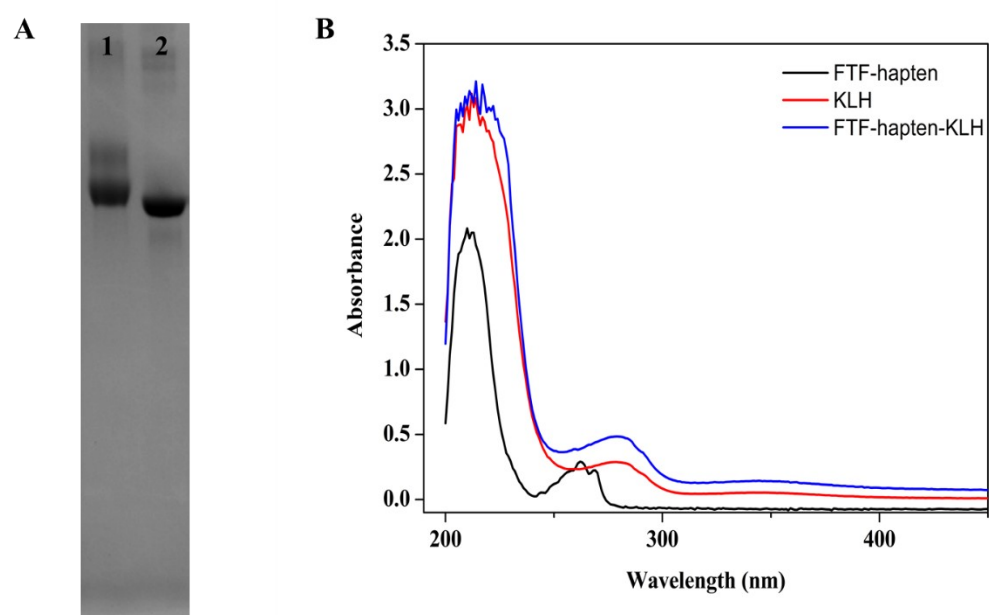

**Fig S2.** (A) The image of gel electropherogram (1 represent FTF-hapten-BSA and 2 represent BSA).

(B) The UV-Vis spectroscopy of FTF-hapten, proteins and conjugates.

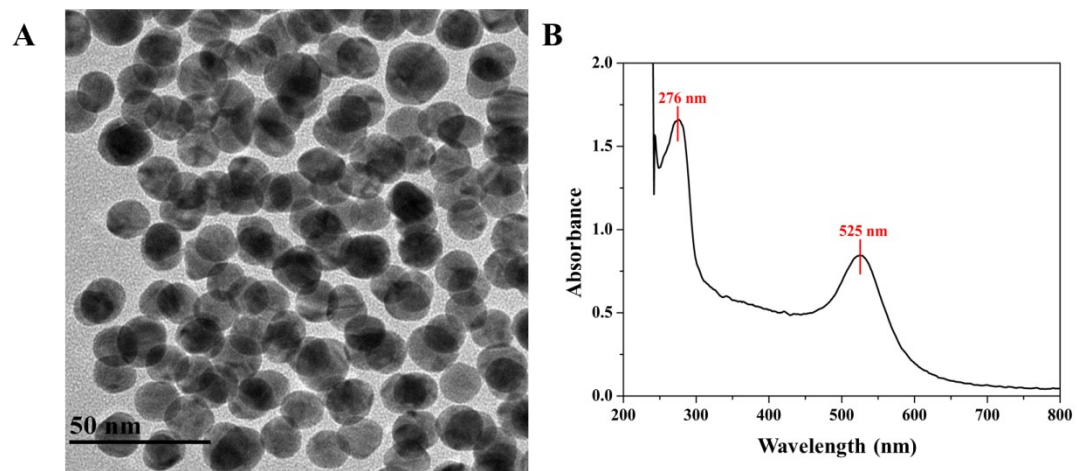

**Fig S3.** (A) TEM image of GNPs-labeled anti-FTF mAb. (B) UV-Vis spectrum of GNPs-labeled anti-FTT mAb.

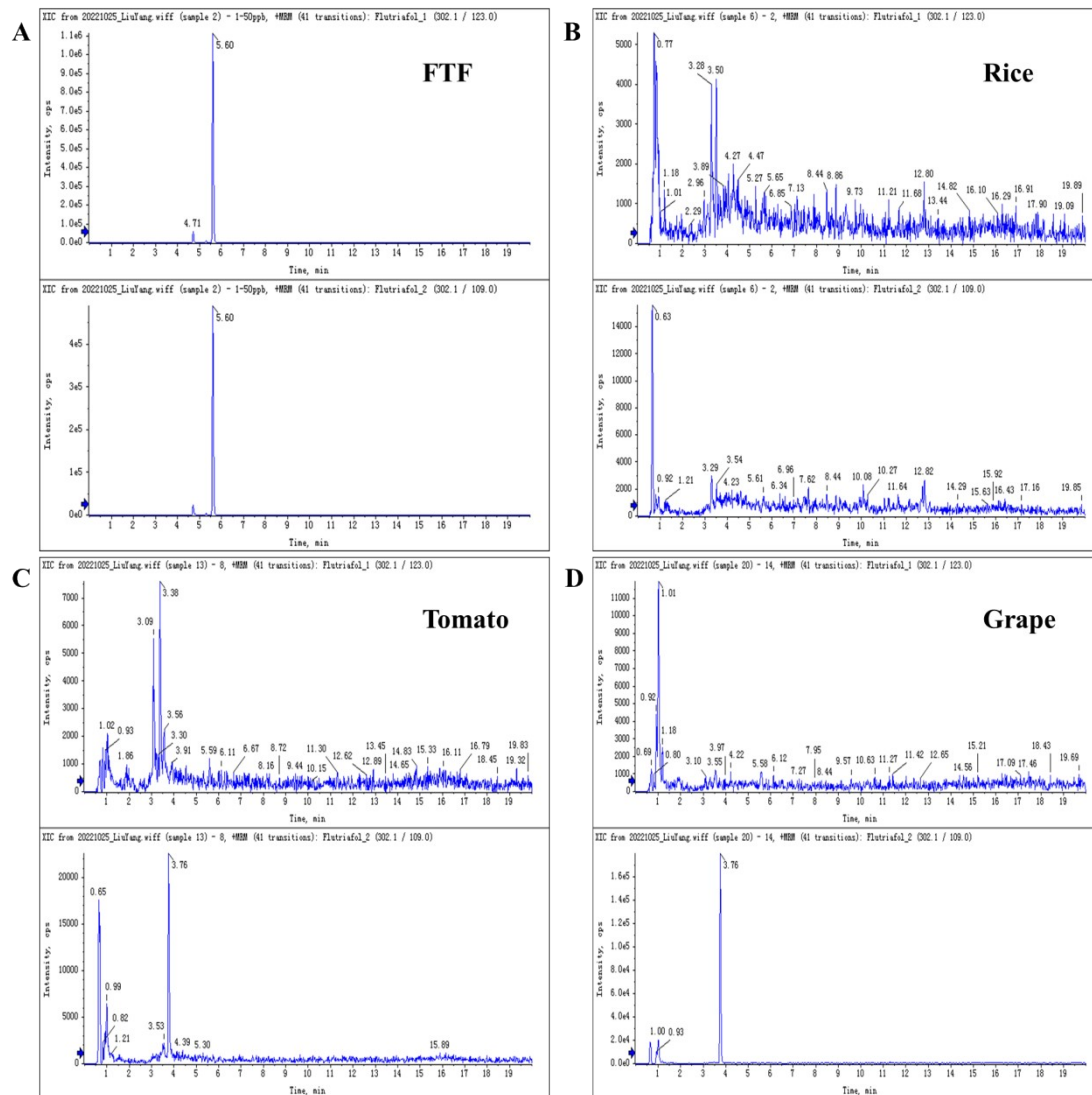

**Fig S4.** LC-MS/MS analysis of FTF standard solution and real food samples. (A) The FTF standard solution. (B-D) The samples of rice, tomato and grape, respectively.

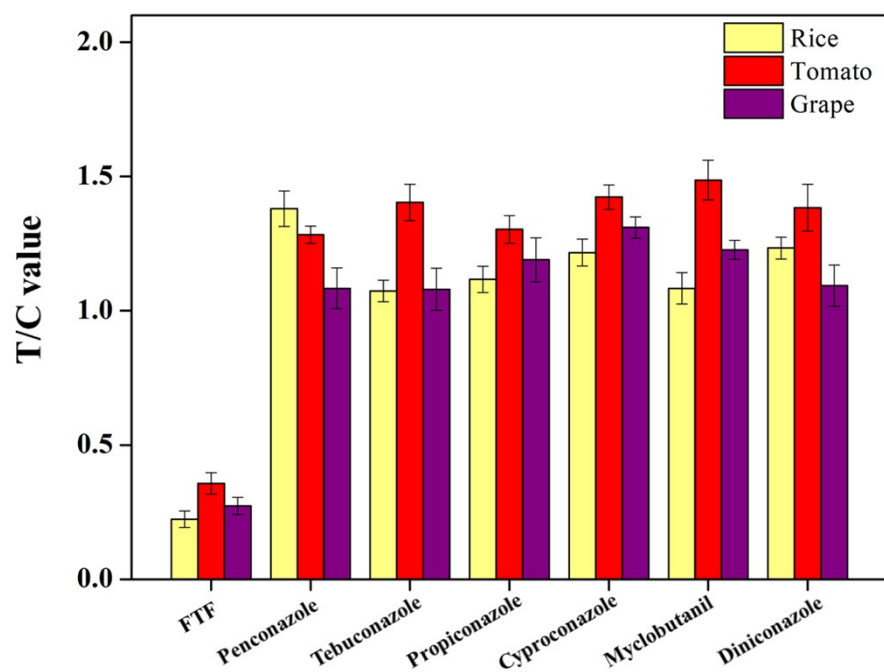

**Fig S5.** The specificity of the GNP based lateral flow immunoassay by comparing FTF and other structural analogs.

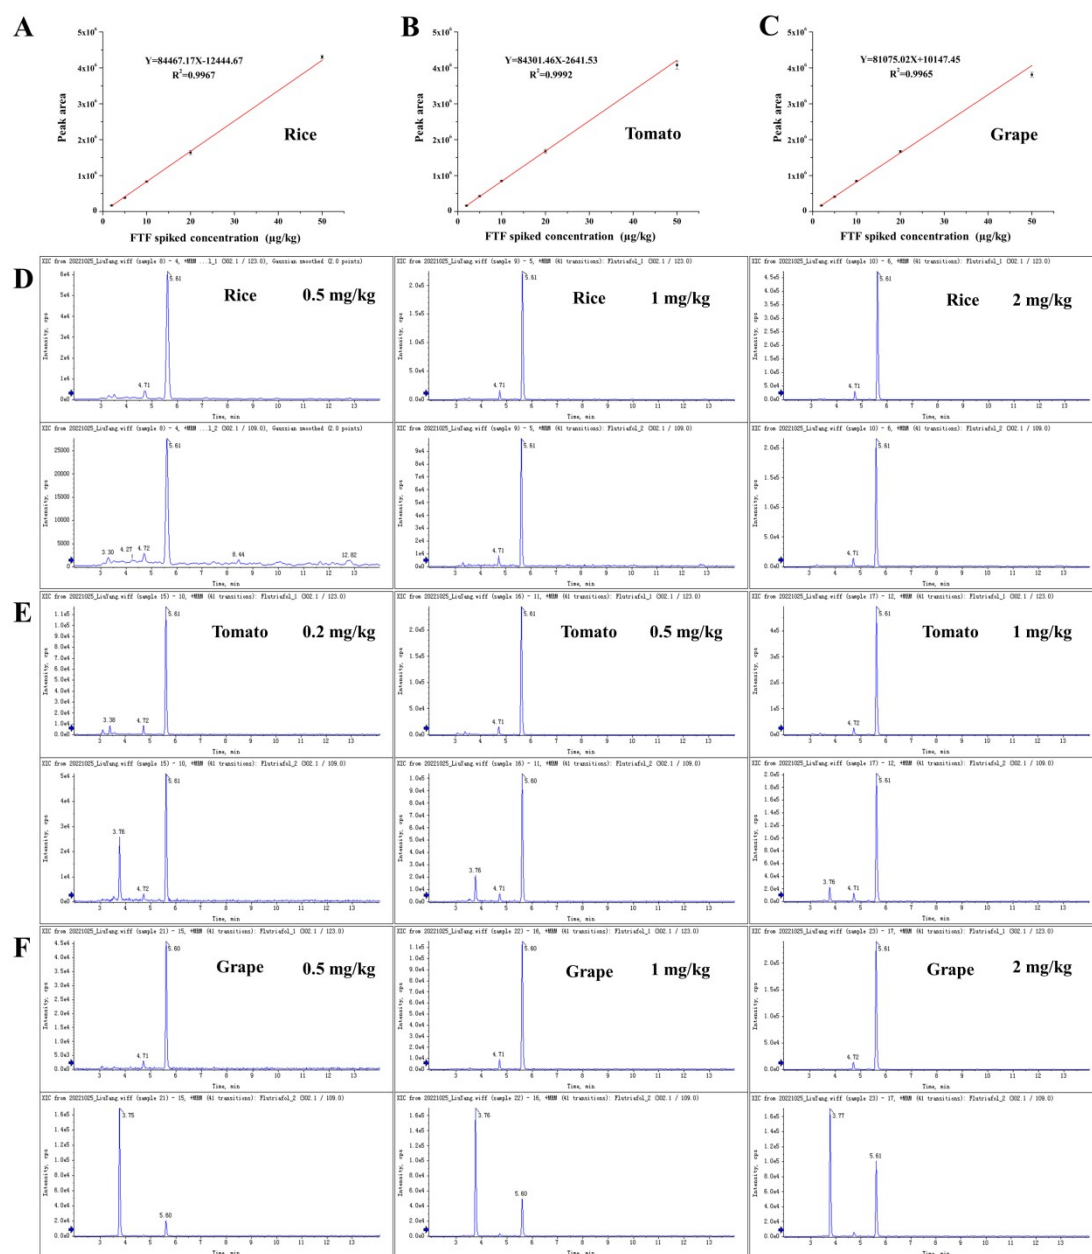

**Fig S6.** (A-C) The regression equation of FTF in rice, tomato and grape by LC-MS/MS. (D-F) LC-MS/MS spectra of different concentrations of FTF in rice, tomato and grape (Due to the high FTF MRLs requirements, considering the detection limit of the instrument method, rice, tomato and grape sample were diluted 50 times).



**Table S1.** Instrument conditions for the analysis of FTF by LC-MS/MS.

|                       |                                                                   |                     |                     |
|-----------------------|-------------------------------------------------------------------|---------------------|---------------------|
| Instrument conditions | AB SCIEX QTRAP 5500 system                                        |                     |                     |
| Spectrum Column       | beh-C18 column (Agilent Zorbax Eclipse Plus) (2.1×100 mm, 1.7 μm) |                     |                     |
|                       | Column temperature: 60 °C                                         |                     |                     |
| Mobile Phase          | A: 0.1% formic acid in water                                      |                     |                     |
|                       | B: Acetonitrile                                                   |                     |                     |
| Gradient Profile      | Time<br>(min)                                                     | Percentage<br>A (%) | Percentage<br>B (%) |
|                       | 0                                                                 | 97                  | 3                   |
|                       | 1                                                                 | 97                  | 3                   |
|                       | 2.5                                                               | 65                  | 35                  |
|                       | 16                                                                | 2                   | 98                  |
|                       | 20                                                                | 2                   | 98                  |
|                       | 20.1                                                              | 97                  | 3                   |
|                       | 23                                                                | 97                  | 3                   |
| Injection Volume      | 2 μL                                                              |                     |                     |
| Flow rate             | 0.3 mL/min                                                        |                     |                     |
| Mass Parameters       | Ion Source: Electrospray ion source                               |                     |                     |
|                       | Atomizing gas: 50 psi                                             |                     |                     |
|                       | Auxiliary heating gas: 50 psi                                     |                     |                     |
|                       | Source Temperature: 350 °C                                        |                     |                     |
|                       | Polarity: Positive                                                |                     |                     |
|                       | Ionspray voltage: 5500 V                                          |                     |                     |

**Table. S2** The specificity of the FTF-mAb was determined by ic-ELISA.

| Analogs       | Structure                                                                           | IC <sub>50</sub> (ng/mL) | CR (%) |
|---------------|-------------------------------------------------------------------------------------|--------------------------|--------|
| Flutriafol    | 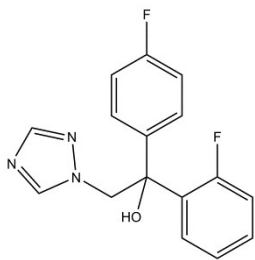   | 1.77                     | 100    |
| Penconazole   |    | >500                     | <5     |
| Tebuconazole  |    | >500                     | <5     |
| Propiconazole |  | >500                     | <5     |
| Cyproconazole |  | >500                     | <5     |
| Myclobutanil  |  | >500                     | <5     |
| Diniconazole  |  | >500                     | <5     |
